# Supplementary material for: Characterization of Carotenoid and Carotenoid Esters of Astringent Persimmon Tissues (<em>Diospyros kaki </em>Thunb. var.<em> Rojo Brillante</em>). Effects of Thermal and High Pressure Non-Thermal Processing
Source: Preprints.org preprint supplement (doi:10.20944/preprints201811.0548.v1), 2018-11-22
Supplement: Supplementary file 1 [file supplementary]

Archive with 5 entries (5 files):
- Fig. S3 Carotenoid proportion (%) of free xanthophylls, hydrocarbon carotenoids and xanthophyll esters .pdf
- Figure 1S Chromatogram of Peel persimmon carotenoid extracts.pdf
- Figure 2S Chromatogram of Pulp persimmon carotenoid extracts .pdf
- Table S1. Quantification of  no saponified persimmon extracts distributed by carotenoid.docx
- Table S2. Quantification of saponified persimmon extracts distributed by carotenoid.docx
