# Supplementary material for: Characterization of Carotenoid and Carotenoid Esters of Astringent Persimmon Tissues (<em>Diospyros kaki </em>Thunb. var.<em> Rojo Brillante</em>). Effects of Thermal and High Pressure Non-Thermal Processing
Source: Preprints.org preprint supplement (doi:10.20944/preprints201811.0548.v1), 2018-11-22

Figure S3. Carotenoid proportion (%) of free xanthophylls, hydrocarbon carotenoids and xanthophyll esters (A) in direct extracts (crude) and (B) in saponified extracts; and of carotenoid species (C) in direct extracts (crude) and (D) in saponified extracts of astringent persimmon (*Diospyros Kaki, L.*) cv. Rojo Brillante submitted to pasteurization (85°C, 15 min) and high-pressure processing (HPP; 200 MPa, 25°C, 6 min).

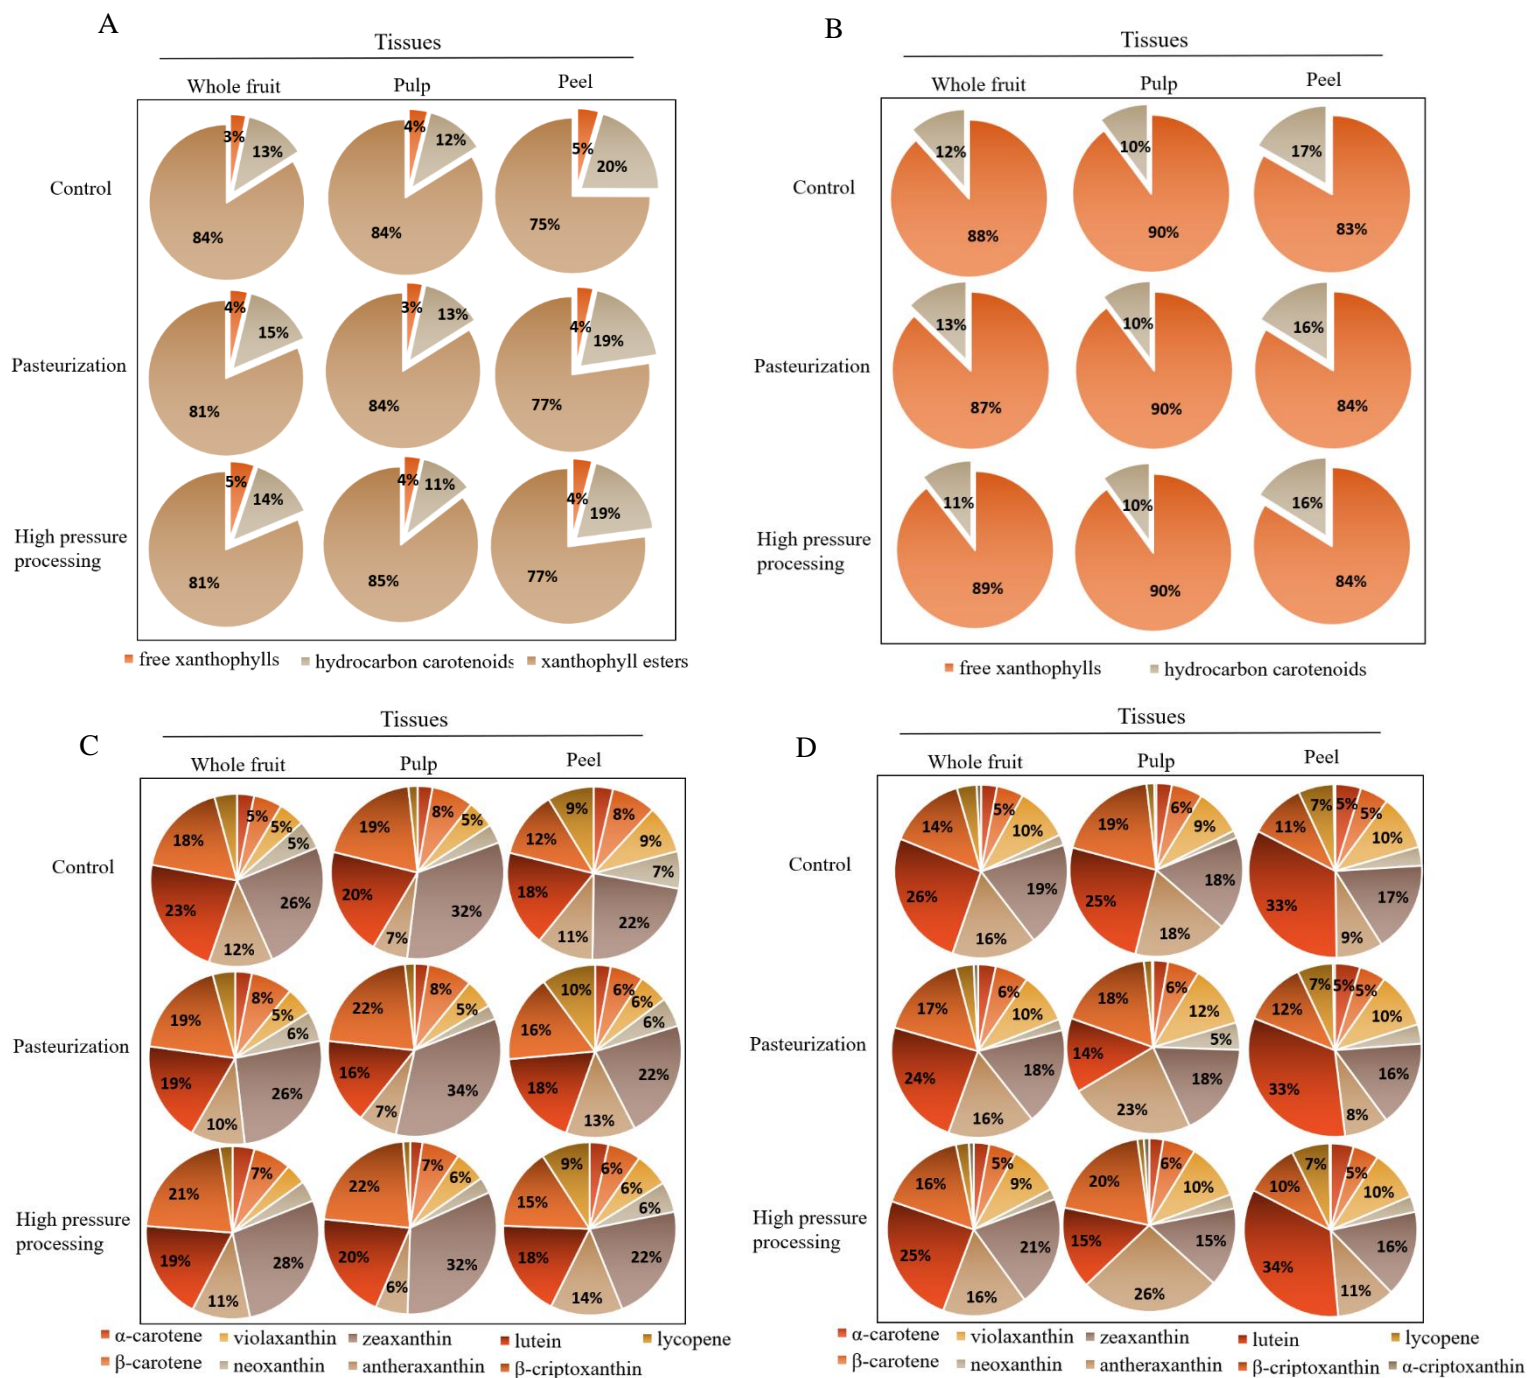

Supplement: Supplementary file 1 [file supplementary › Fig. S3 Carotenoid proportion (%) of free xanthophylls, hydrocarbon carotenoids and xanthophyll esters .pdf]
