# Supplementary figures and images for: Characterization of Carotenoid and Carotenoid Esters of Astringent Persimmon Tissues (<em>Diospyros kaki </em>Thunb. var.<em> Rojo Brillante</em>). Effects of Thermal and High Pressure Non-Thermal Processing
Source: Preprints.org preprint supplement (doi:10.20944/preprints201811.0548.v1), 2018-11-22

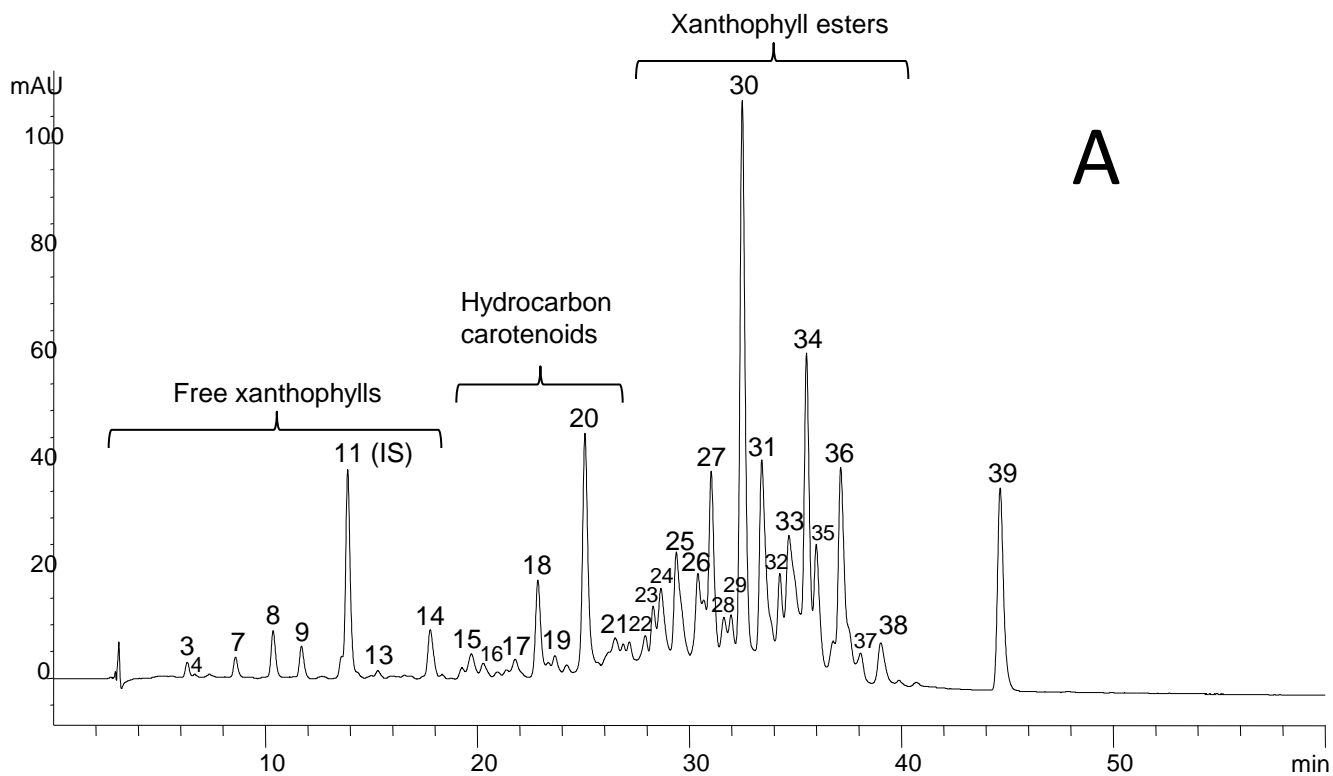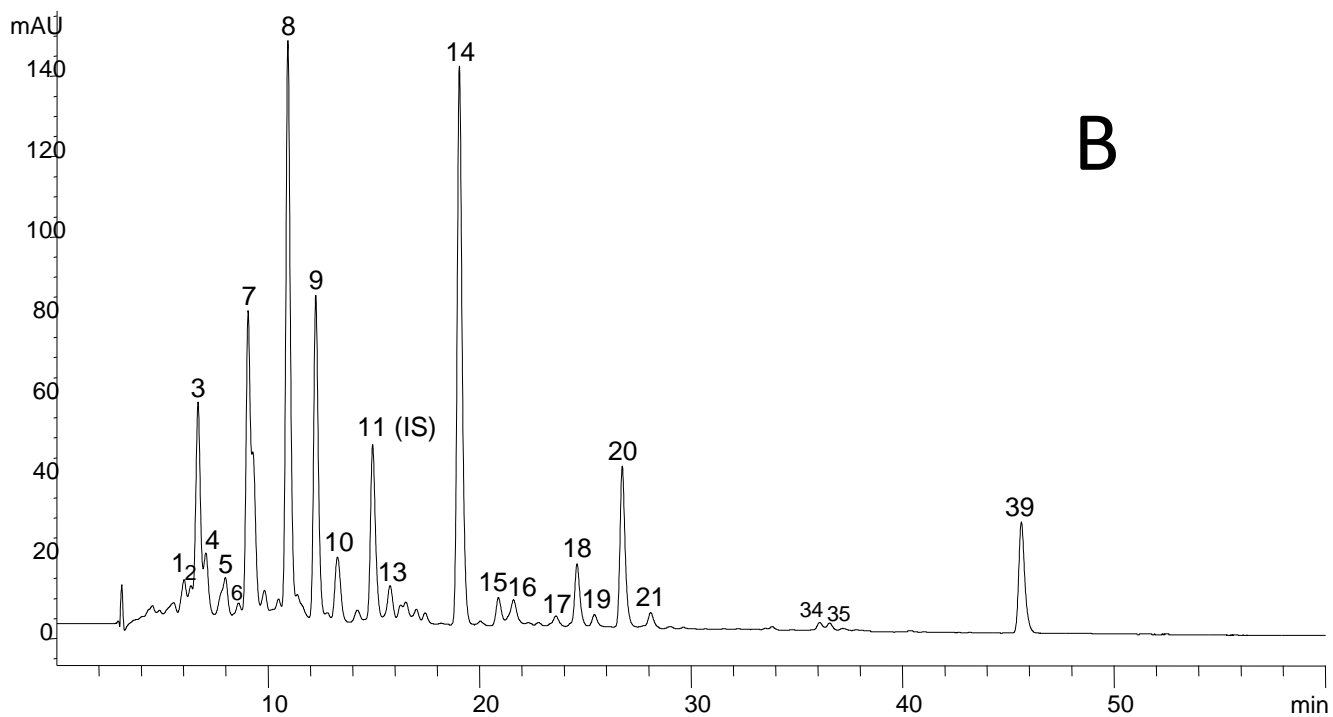

Supplement: Supplementary file 1 [file supplementary › Figure 1S Chromatogram of Peel persimmon carotenoid extracts.pdf]

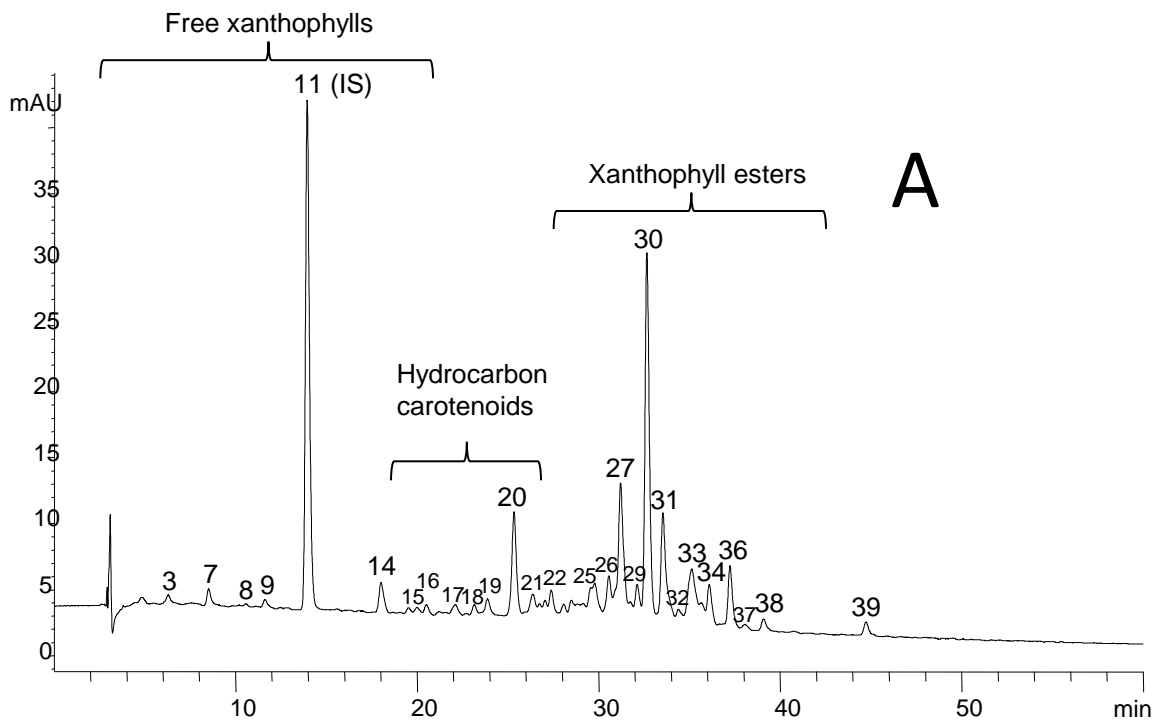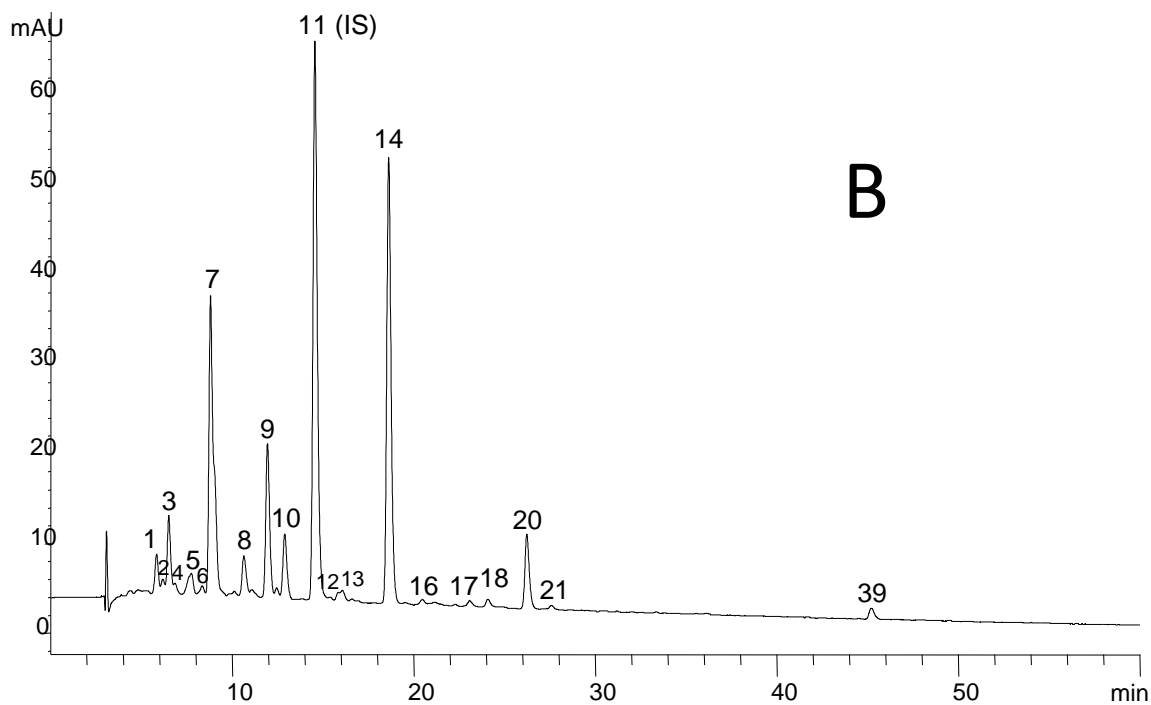

Supplement: Supplementary file 1 [file supplementary › Figure 2S Chromatogram of Pulp persimmon carotenoid extracts .pdf]
